# Supplementary material
Source: ML conference proceedings conference paper supplement (https://openaccess.thecvf.com/content/CVPR_2019/html/Wang_Ranked_List_Loss_CVPR_2019_paper.html)
Supplement: Supplementary file 1 [file Wang_Ranked_List_Loss_CVPR_2019_supplemental.pdf]

Archive with 3 entries (2 files):
- 3211-supp/
- 3211-supp/retrieval_v02.png
- 3211-supp/SOP_Barnes_Hut_t-SNE_visualisation.jpg
